# Supplementary material
Source: PubMed Central journal article supplement (PMC9256801)
Supplement: NIHMS1805442-supplement-1.pdf [file NIHMS1805442-supplement-1.pdf]

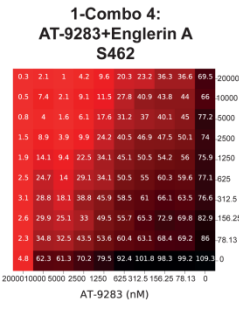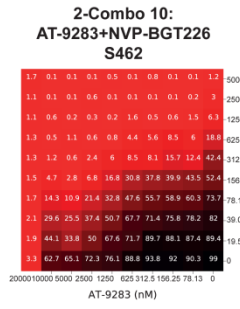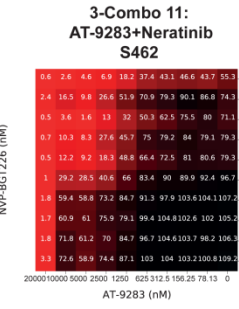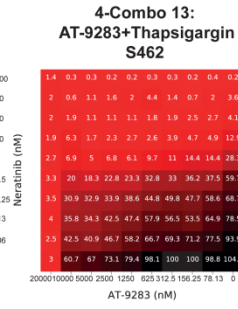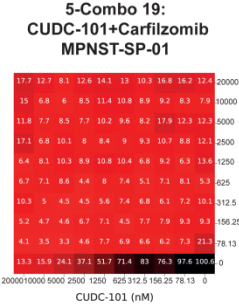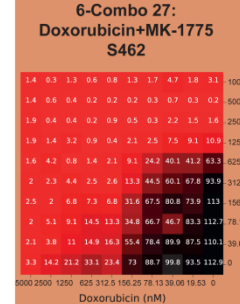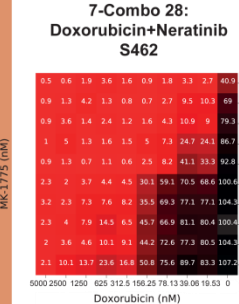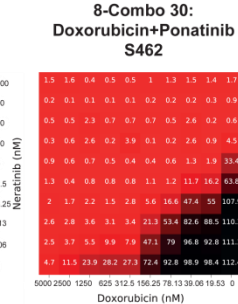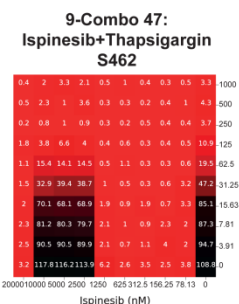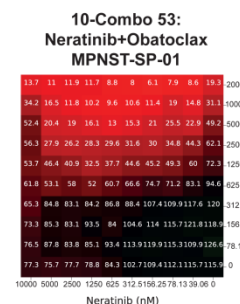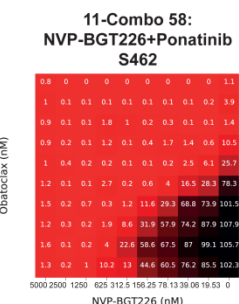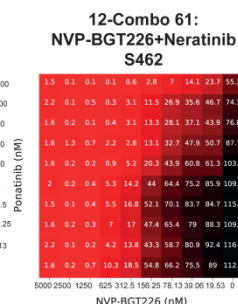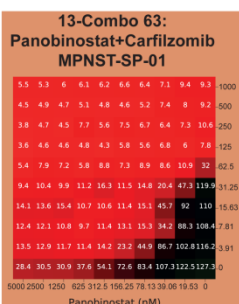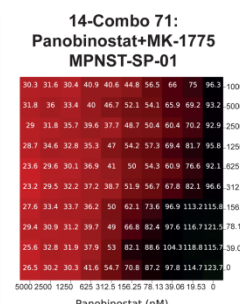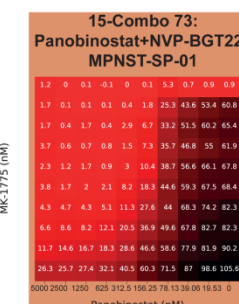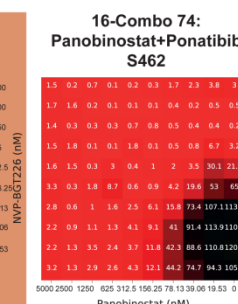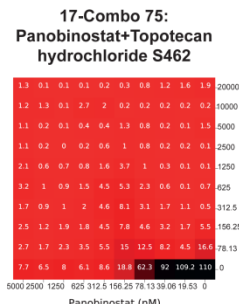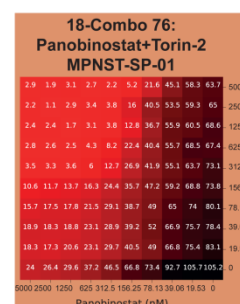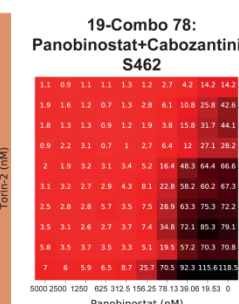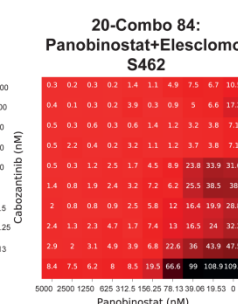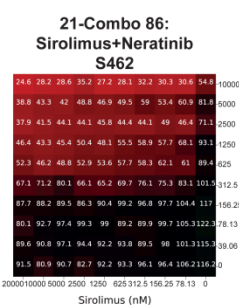

Figure S1. Heatmap matrices 10x10 from the 21 selected synergistic combinations. The combinations that were further validated *in vivo* are highlighted in orange.

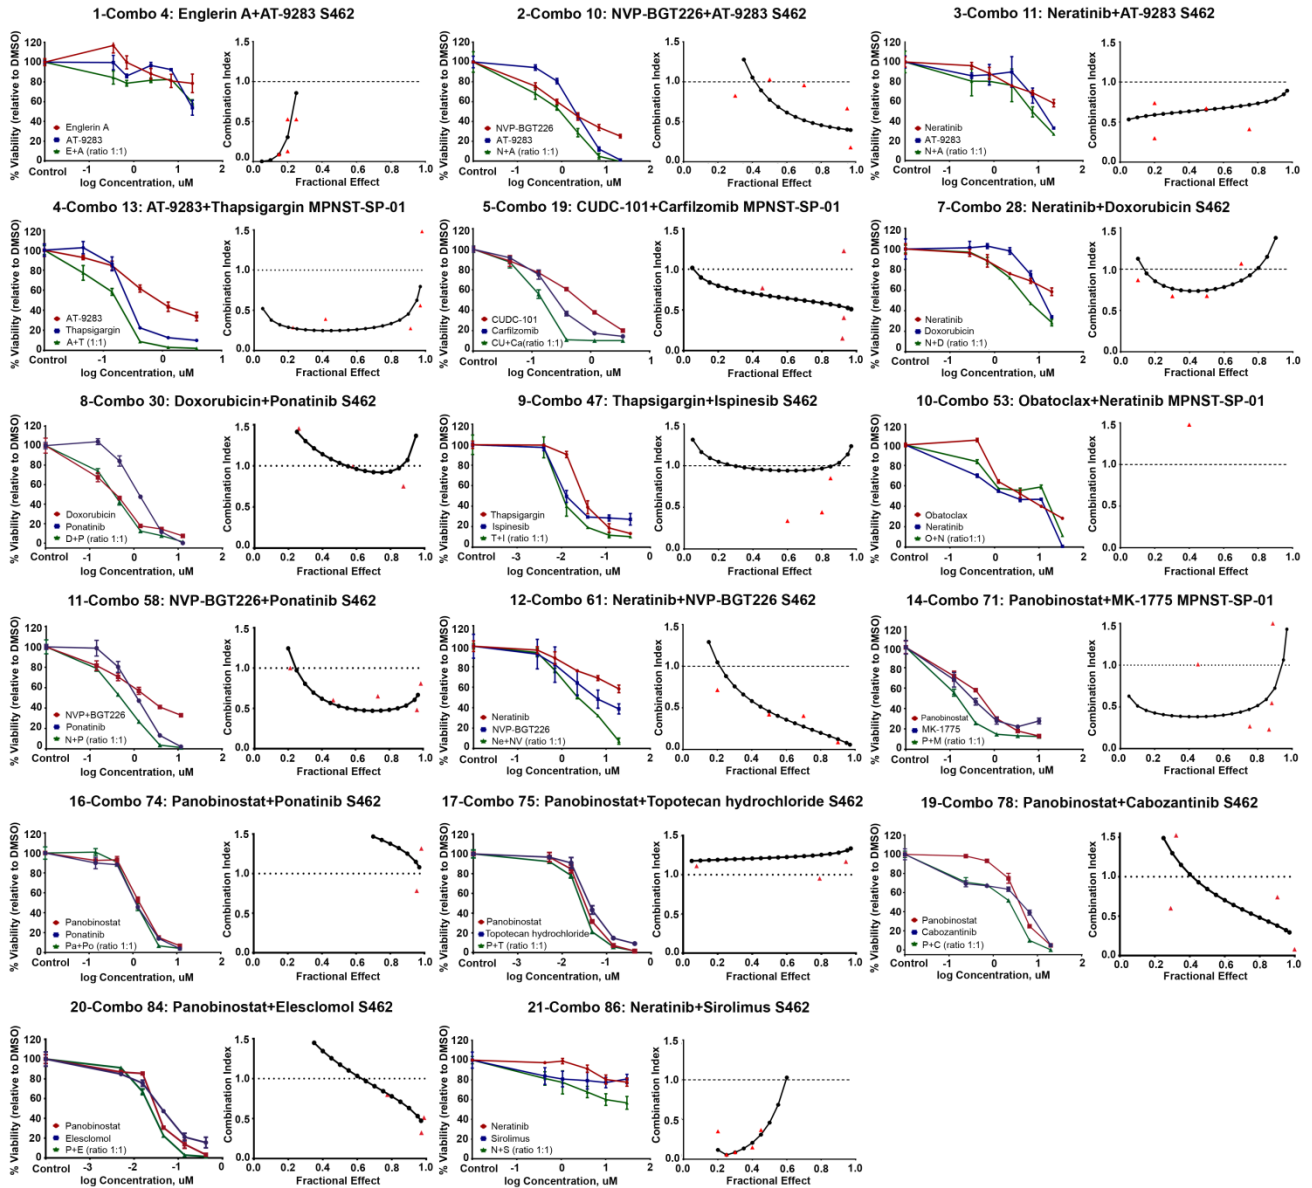

**Figure S2.** Single-agent and combined responses from the 17 selected synergistic combinations that were not validated *in vivo* in terms of dose-response on cell viability (left) and Combination Index values (right).

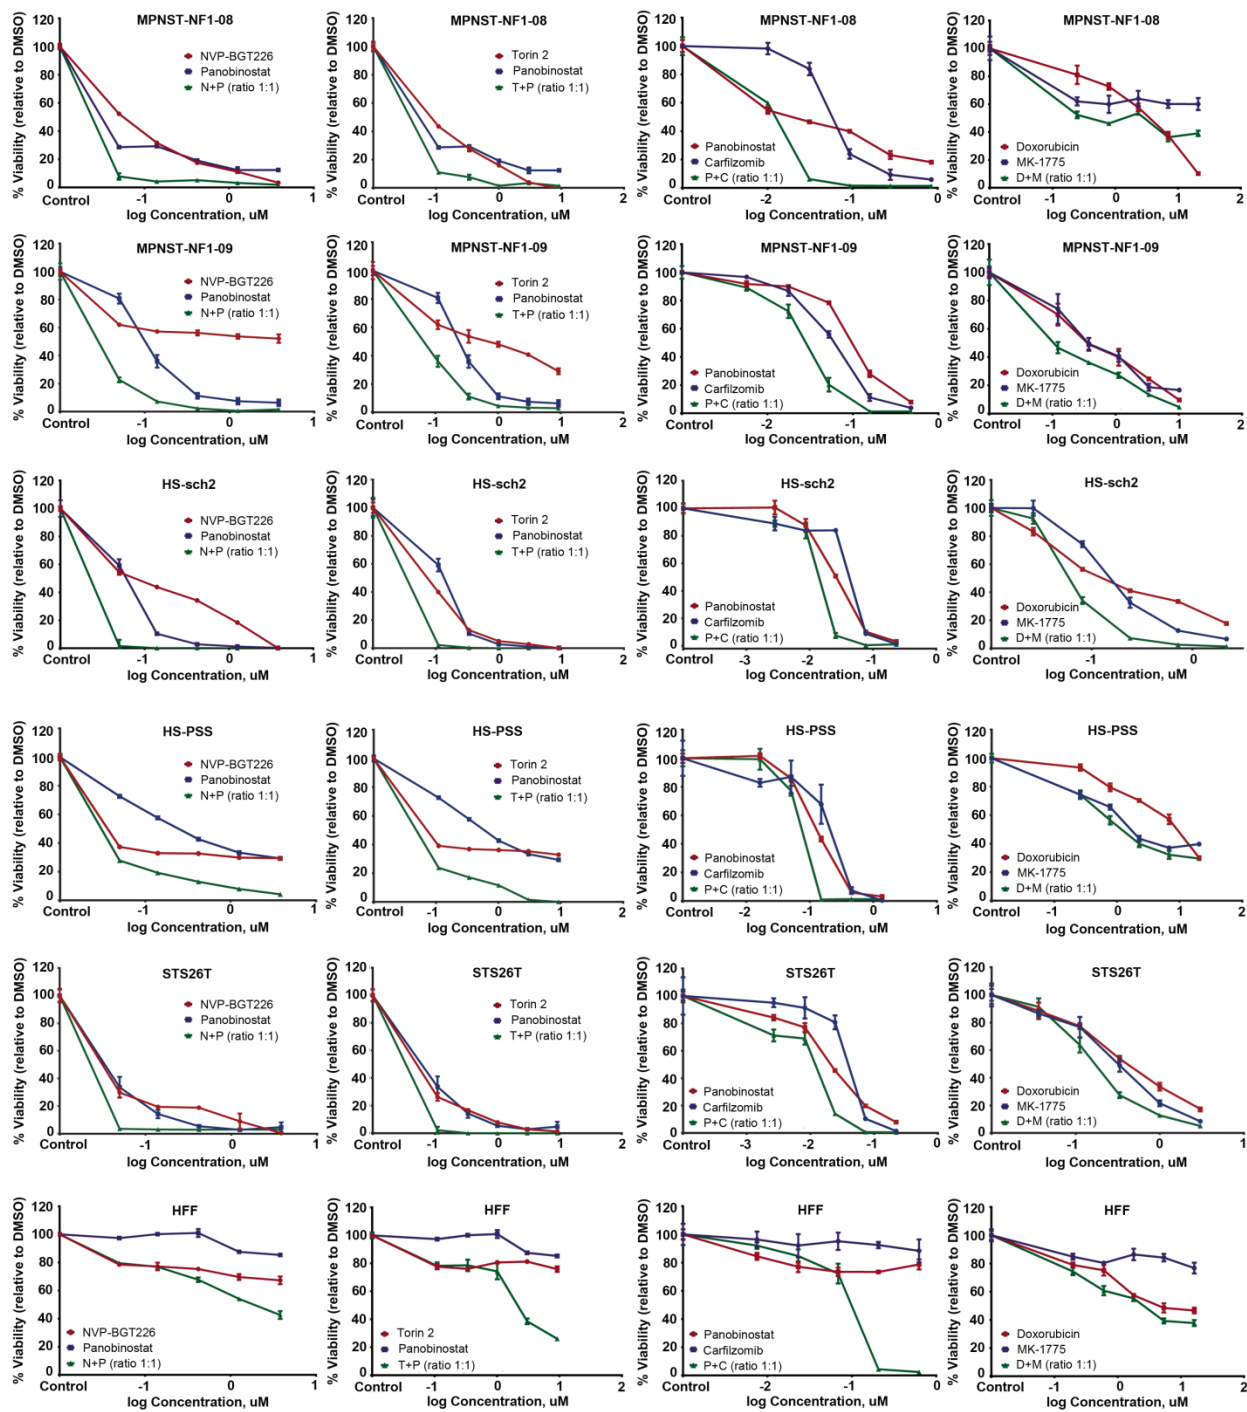

**Figure S3.** Single-agent and combined responses on cell viability of six MPNST cell lines and a non-tumor fibroblastic cell line (Human Foreskin Fibroblast) from the four most synergistic combinations, which are further validated *in vivo*.

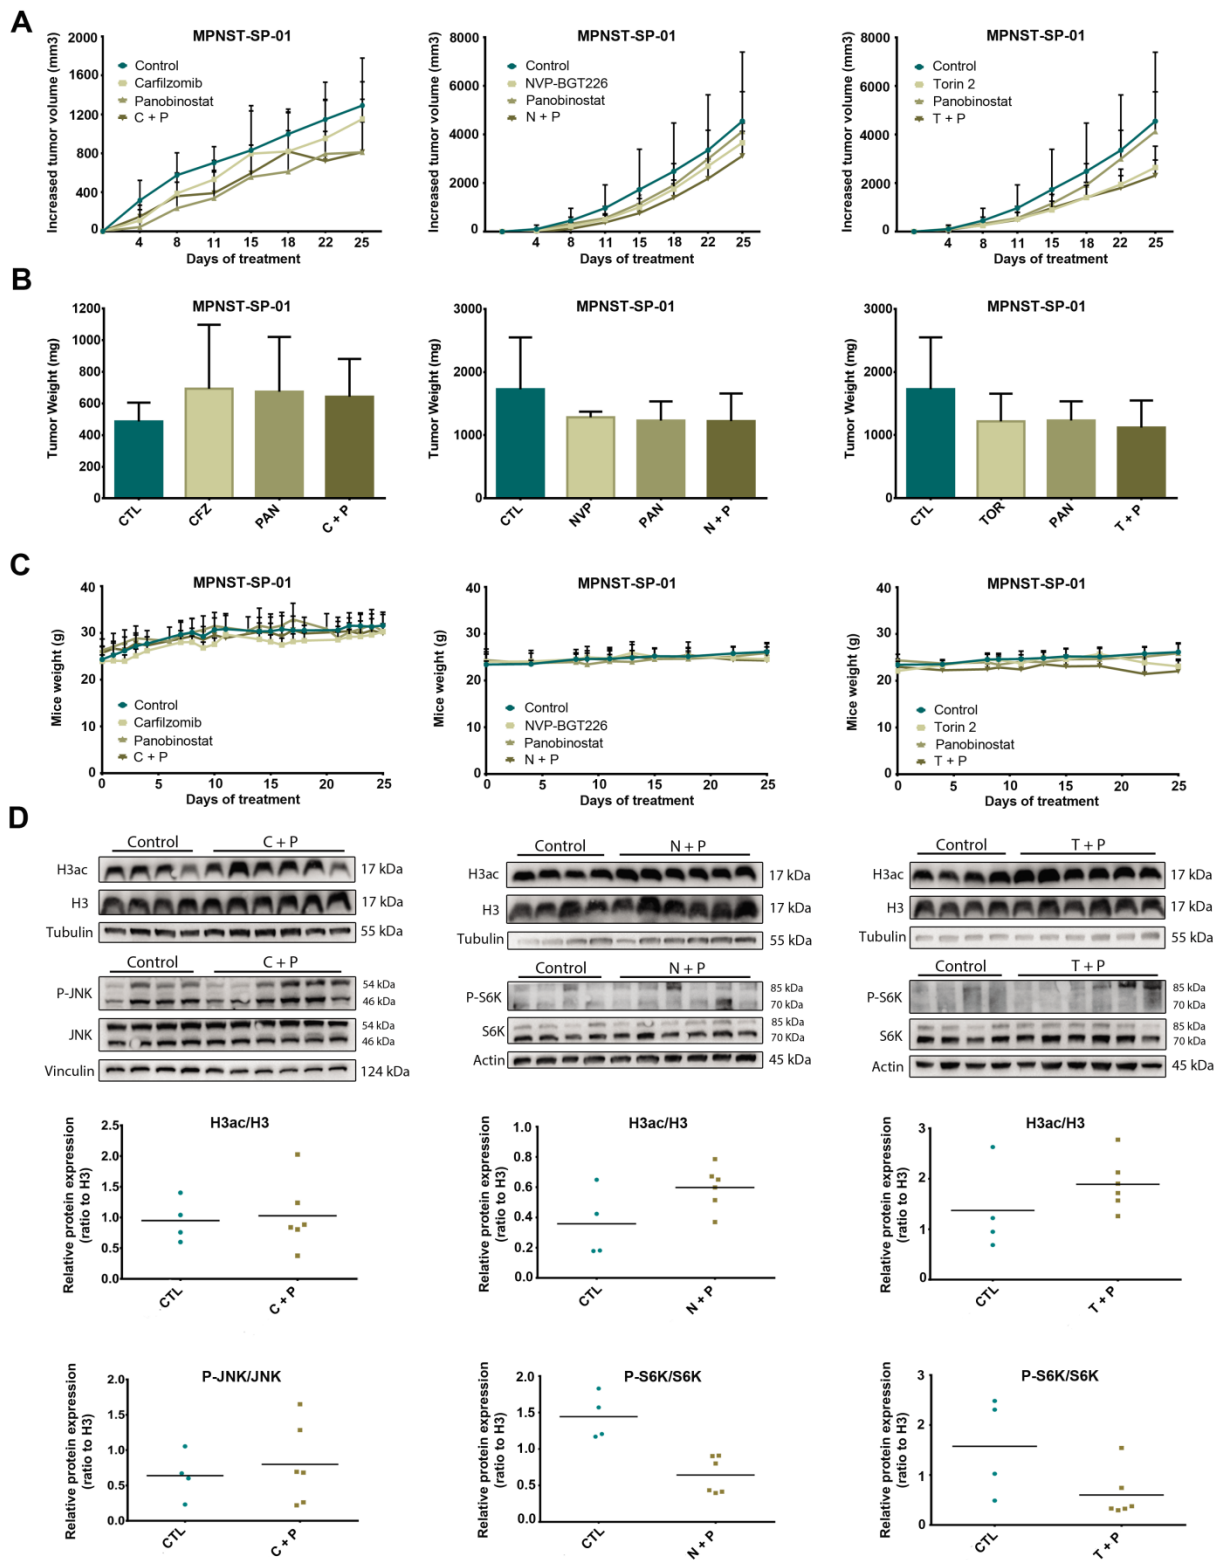

**Figure S4.** Combination treatments including Panobinostat (with Carfilzomib/Torin 2/NVP-BGT226) in MPNST-SP-01 PDOX model. **A.** Increased tumor volume during treatment with single-agents and combinations. **B.** Mean tumor weight after 25 days of single-agent and combined treatments. **C.** Mouse weight evolution during treatments. **D.** Protein expression analyses by Western blot for the main drug molecular targets in control tumors (n=4) and tumors treated with combinations (n=6). CTL: mice treated with vehicle, BGT226: mice treated with NVP-BGT226, PAN: mice treated with Panobinostat, CFZ: mice treated with Carfilzomib, CFZ+PAN: mice treated with the combination Carfilzomib and Panobinostat, BGT226+PAN: mice treated with the combination NVP-BGT226 + Panobinostat, H3ac: acetylation of Histone 3, P-JNK: phosphorylation of JNK, P-S6K: phosphorylation of S6K.

**Table S1.** Clinical and molecular data of patients and tumors used to isolate the MPNST-SP-01, MPNST-NF1-08, and MPNST-NF1-09 cell lines.

| Tumor ID     | Age | Sex | Ethnicity | NF1/<br>sporadic | Tumor grade | Location        | NF1                                           |                                                      | CDK2NA                                                               | PRC2                                    |     |                                        | H3K27 staining | TP53                                 |
|--------------|-----|-----|-----------|------------------|-------------|-----------------|-----------------------------------------------|------------------------------------------------------|----------------------------------------------------------------------|-----------------------------------------|-----|----------------------------------------|----------------|--------------------------------------|
|              |     |     |           |                  |             |                 | Germline                                      | Somatic                                              |                                                                      | SUZ12                                   | EED | EZH1                                   |                |                                      |
| MPNST-SP-01  | 88  | M   | EU(Spain) | Sporadic         | IV          | Latero cervical | -                                             | NM_000267.2:<br>c.3520C>T<br>p.(Gln1174*)            | -                                                                    | -                                       | -   | NM_001991.3:<br>c.196C>T<br>(p.(Q72X)) | Negative       | NM_001126115.2:<br>c.553C>T<br>+ LOH |
| MPNST-NF1-08 | 28  | M   | EU(Spain) | NF1              | III         | Dorsal          | NM_000267.2:<br>c.701_730+10del<br>(intronic) | LOH                                                  | chr9:g.20290684_24186926del<br>(HD by inversions and translocations) | NM_015355.2:<br>c.1235_1240del<br>+ LOH | -   | -                                      | Negative       | -                                    |
| MPNST-NF1-09 | 35  | F   | EU(Spain) | NF1              | III         | Sciatic nerve   | NM_000267.2:<br>c.6792C>A<br>p.(Tyr2264*)     | NM_000267.2:<br>c.1186-5_1186-1delATAG<br>(intronic) | chr9:g.21953930_22196588del<br>(HD by inversions)                    | -                                       | -   | -                                      | Positive       | NM_001126115.2:<br>c.448C>T<br>+ LOH |

**Table S2.** Dosage toxicity and administration schedule tests for the four combinations that were tested in our PDOX models.

|                 | Compound 1         | Dose (mg/kg) | Schedule (days a week) | Administration route | Compound 2          | Dose (mg/kg) | Schedule (days a week)   | Administration route | Weight reduction | Mortality |
|-----------------|--------------------|--------------|------------------------|----------------------|---------------------|--------------|--------------------------|----------------------|------------------|-----------|
| 1               | NVP-BGT226         | 5            | 5                      | ip                   | Panobinostat        | 5            | 5                        | ip                   | >20%             | 60%       |
| 2               | NVP-BGT226         | 5            | 3                      | ip                   | Panobinostat        | 5            | 3                        | ip                   | >10%             | -         |
| 3               | <b>NVP-BGT226</b>  | <b>2.5</b>   | <b>3</b>               | <b>ip</b>            | <b>Panobinostat</b> | <b>5</b>     | <b>3</b>                 | <b>ip</b>            | <b>&lt;10%</b>   | -         |
| 4               | NVP-BGT226         | 2.5          | 5                      | ip                   | Panobinostat        | 5            | 5                        | ip                   | >10%             | -         |
| 5               | Torin 2            | 20           | 3                      | ip                   | Panobinostat        | 5            | 3                        | ip                   | >20%             | 90%       |
| 6               | Torin 2            | 10           | 2                      | ip                   | Panobinostat        | 5            | 2                        | ip                   | <10%             | -         |
| 7               | <b>Torin 2</b>     | <b>10</b>    | <b>3</b>               | <b>ip</b>            | <b>Panobinostat</b> | <b>5</b>     | <b>3</b>                 | <b>ip</b>            | <b>&lt;10%</b>   | -         |
| 8               | Torin 2            | 10           | 5                      | ip                   | Panobinostat        | 5            | 5                        | ip                   | >10%             | -         |
| 9               | Torin 2            | 5            | 3                      | ip                   | Panobinostat        | 5            | 3                        | ip                   | <10%             | -         |
| 10              | MK-1775            | 20           | 5                      | oral                 | Doxorubicin         | 8            | Once at beginning        | ip                   | <10%             | -         |
| 11              | <b>MK-1775</b>     | <b>50</b>    | <b>5</b>               | <b>oral</b>          | <b>Doxorubicin</b>  | <b>8</b>     | <b>Once at beginning</b> | <b>ip</b>            | <b>&lt;10%</b>   | -         |
| 12              | <b>Carfilzomib</b> | <b>2</b>     | <b>2</b>               | <b>iv</b>            | <b>Panobinostat</b> | <b>5</b>     | <b>5</b>                 | <b>ip</b>            | <b>0%</b>        | -         |
| 13 <sup>1</sup> | Carfilzomib        | 2            | 2                      | iv                   | Panobinostat        | 10           | 5                        | ip                   | <10%             | -         |
| 14              | Carfilzomib        | 2            | 2                      | iv                   | Panobinostat        | 10           | 3                        | ip                   | <10%             | -         |
| 15              | Carfilzomib        | 5            | 2                      | iv                   | Panobinostat        | 5            | 5                        | ip                   | 10%              | -         |
| 16              | Carfilzomib        | 5            | 2                      | iv                   | Panobinostat        | 10           | 5                        | ip                   | -                | 100%      |
| 17              | Carfilzomib        | 5            | 2                      | iv                   | Panobinostat        | 10           | 3                        | ip                   | -                | 100%      |

<sup>1</sup>The doses and administration schedules for Carfilzomib and Panobinostat were further used in our PDOX model, but high mortality occurred in the first week of treatment.

iv: intravenous

ip: intraperitoneal

**Table S3.** Dosages, solvents, and schedule of administration for the compounds used in the *in vivo* experiments.

| Compound            | Administration route | Dose (mg/Kg) | Solvent                            | Schedule                          | Days of administration per week |
|---------------------|----------------------|--------------|------------------------------------|-----------------------------------|---------------------------------|
| <b>Panobinostat</b> | ip                   | 5            | 98% Dextrose (5%) in water+2% DMSO | TIW                               | Day 1, 3, 5                     |
| <b>NVP-BGT226</b>   | ip                   | 2.5          | 90% Saline+10% DMSO                | TIW                               | Day 1, 3, 5                     |
| <b>Torin 2</b>      | ip                   | 10           | 80% water+10% Khollipor+10% DMSO   | TIW                               | Day 1, 3, 5                     |
| <b>Carfilzomib</b>  | iv                   | 2            | Saline 5% Glucose                  | BW                                | Day 1, 2                        |
| <b>MK-1775</b>      | oral                 | 50           | Methylcellulose 0.5% in saline     | 5 Day On, 2 Day Off               | Day 1, 2, 3, 4, 5               |
| <b>Doxorubicin</b>  | ip                   | 8            | Saline                             | 1 dose in the 1 <sup>st</sup> day | -                               |

TIW: three times a week, BW: twice a week.

iv: intravenous

ip: intraperitoneal
